# Supplementary material
Source: PubMed Central journal article supplement (PMC4415877)

Supplementary Fig. 1

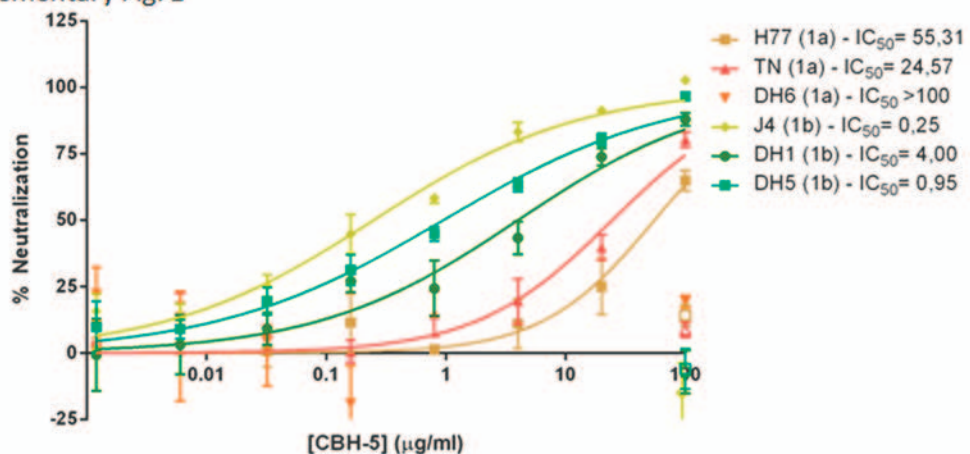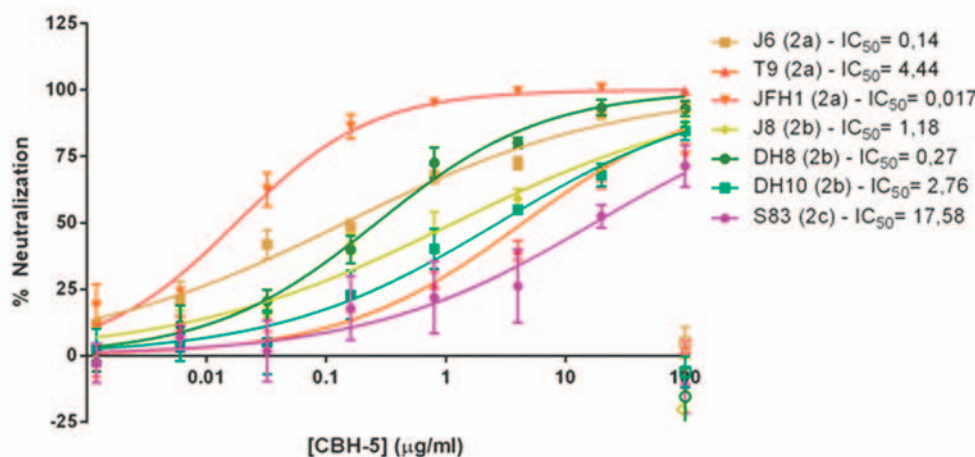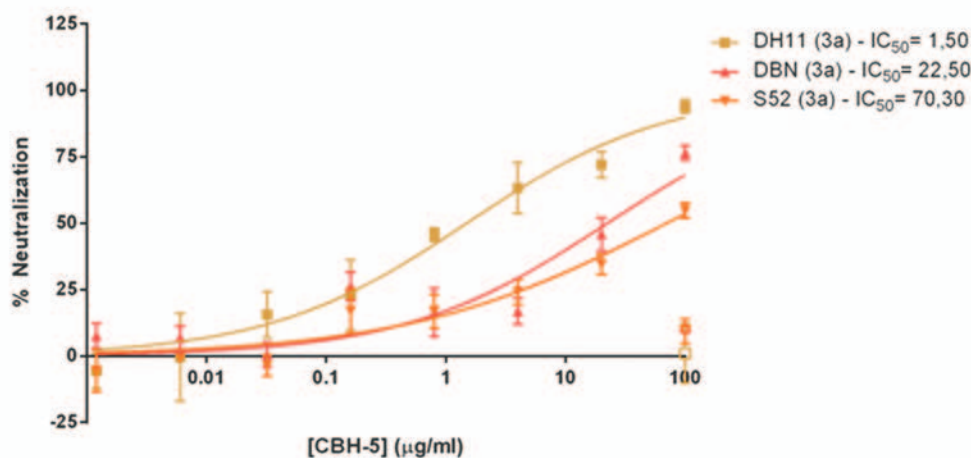

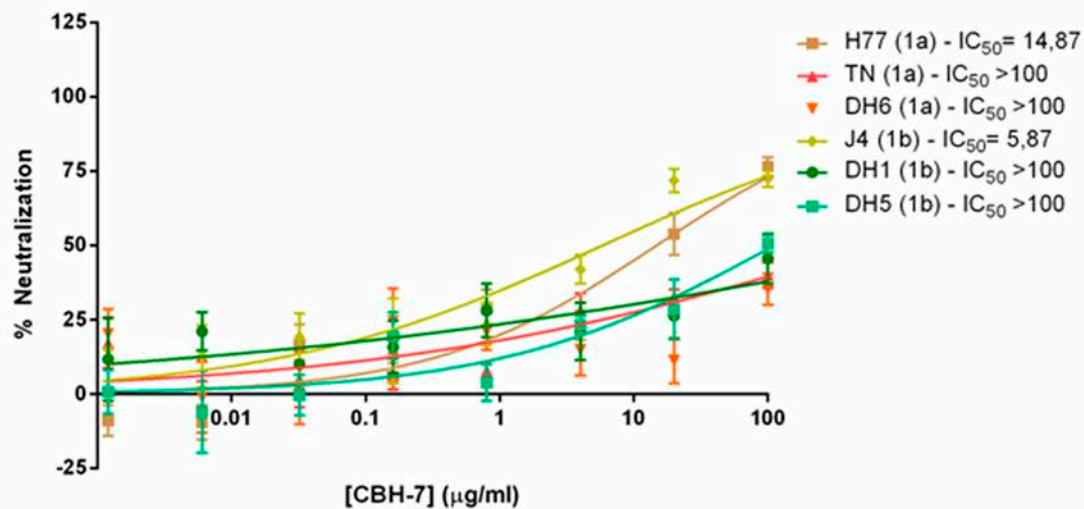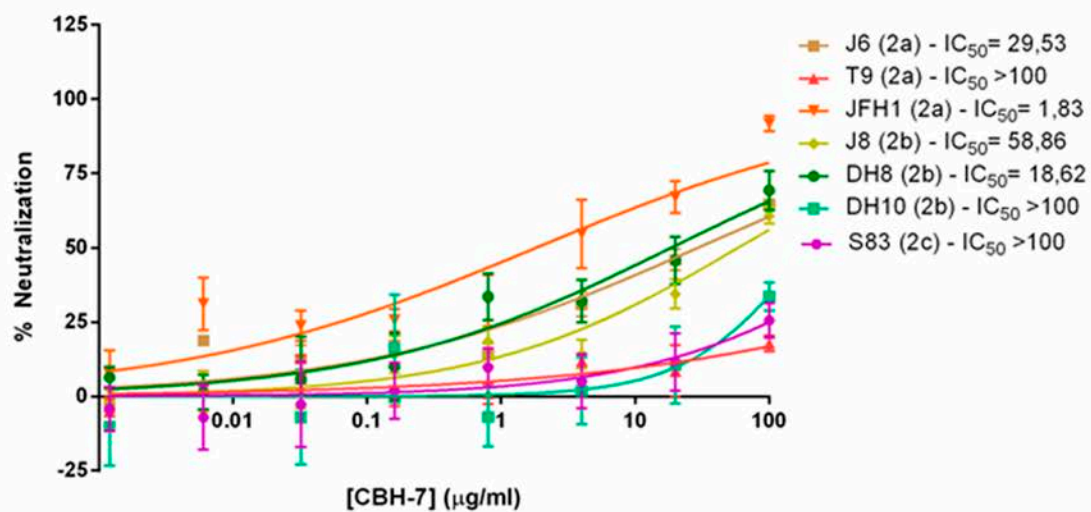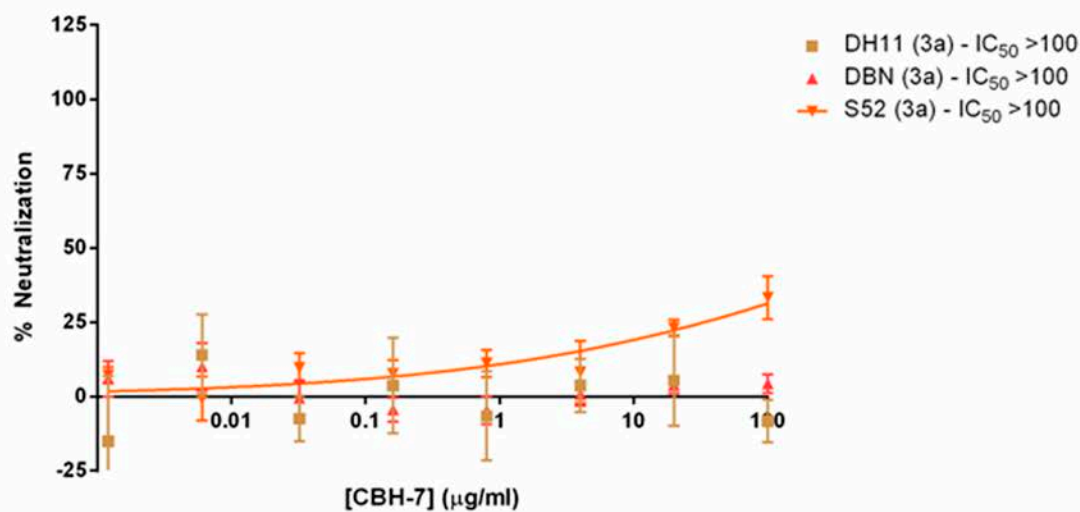

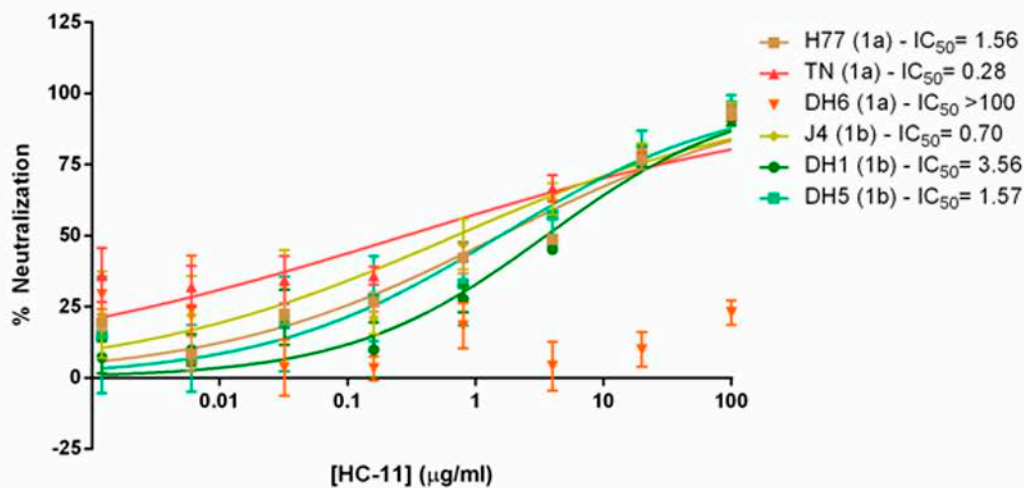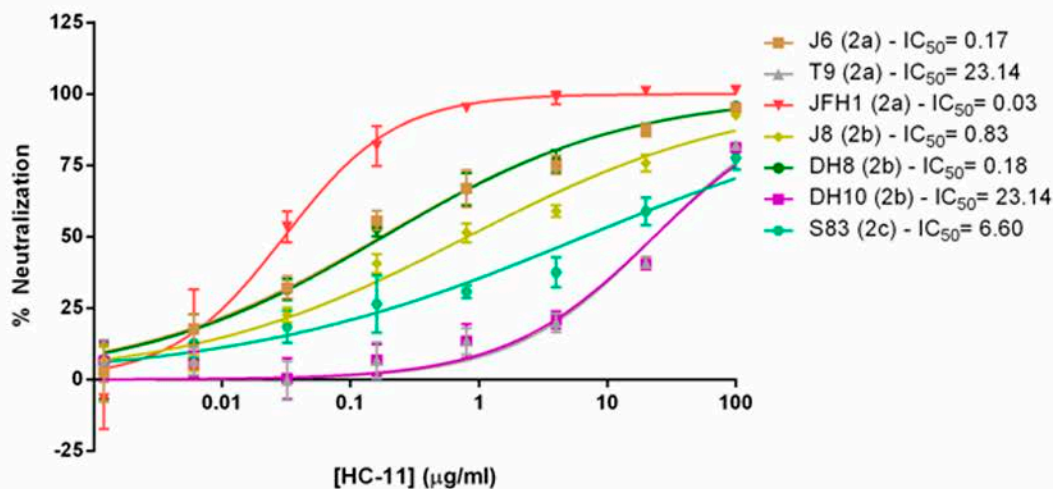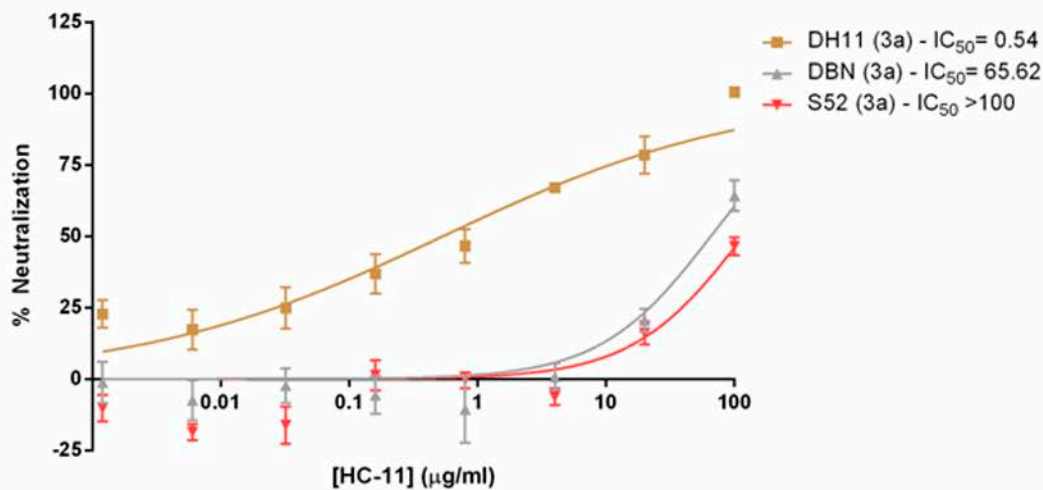

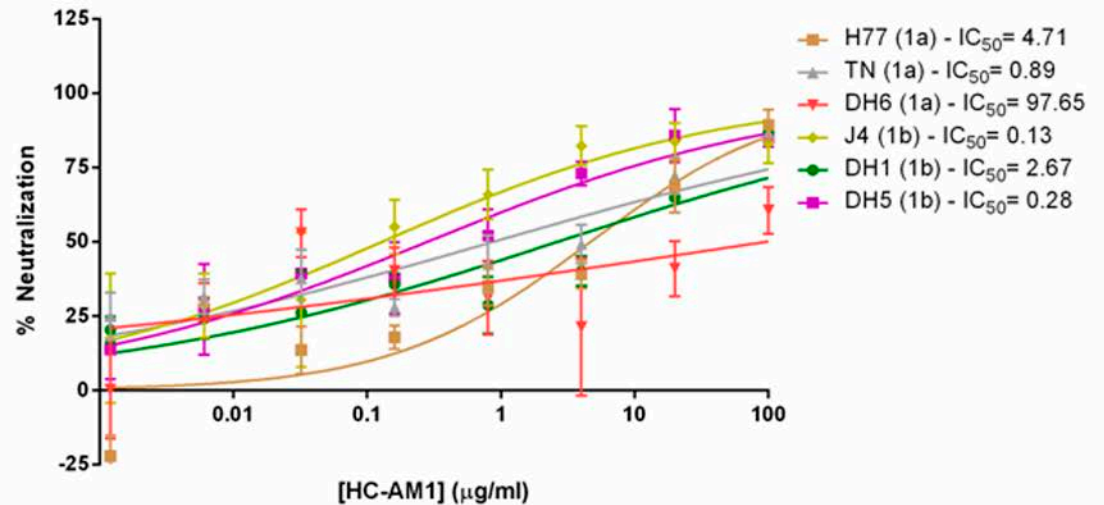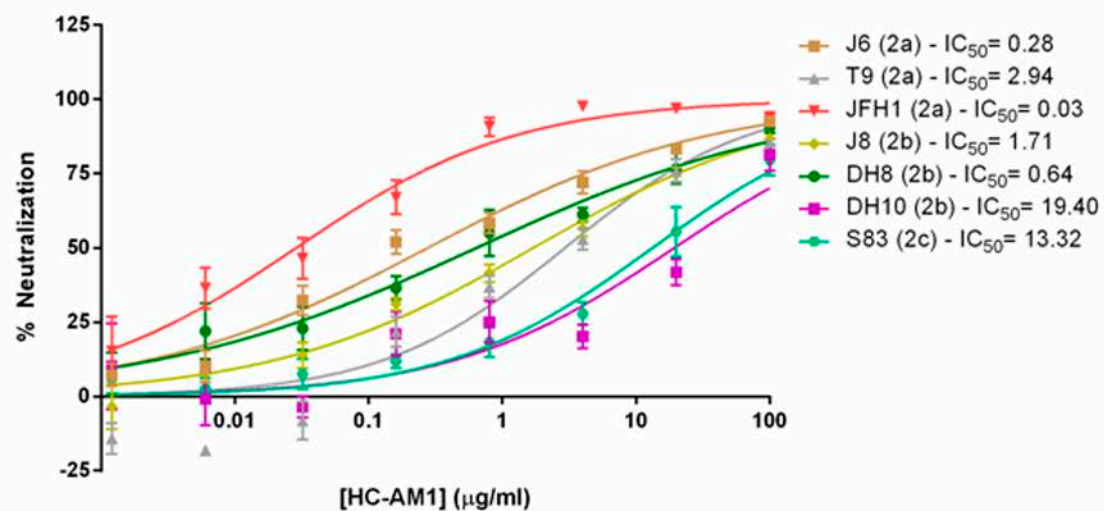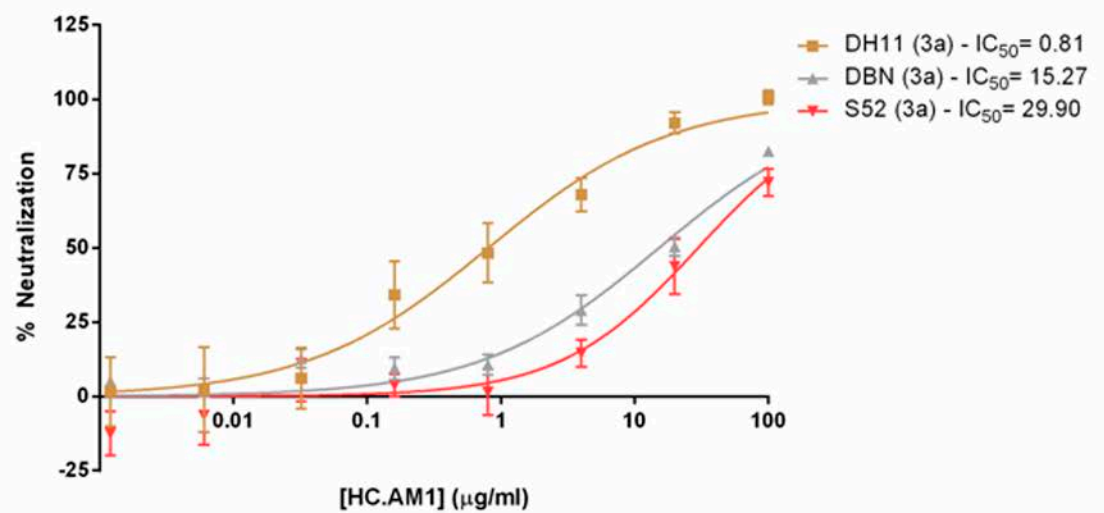

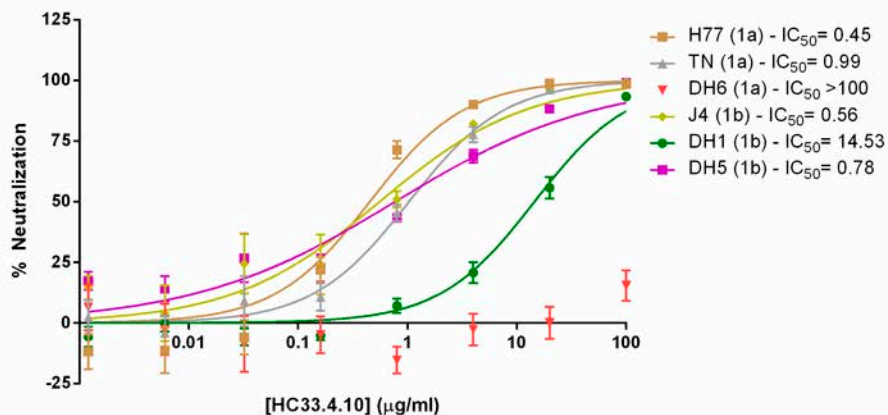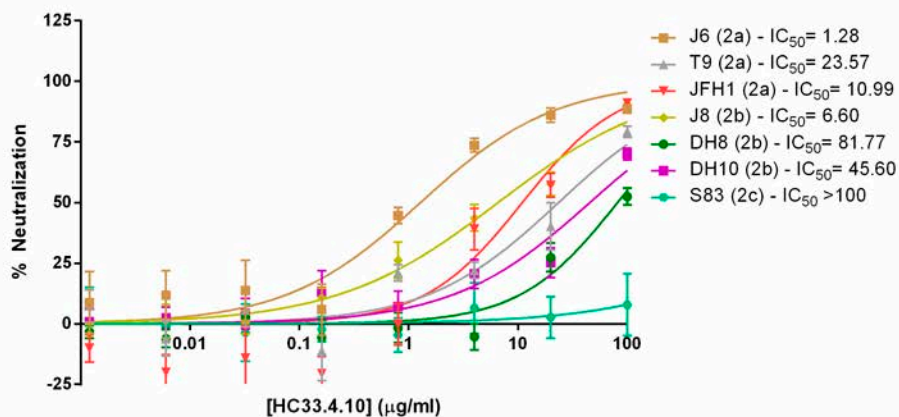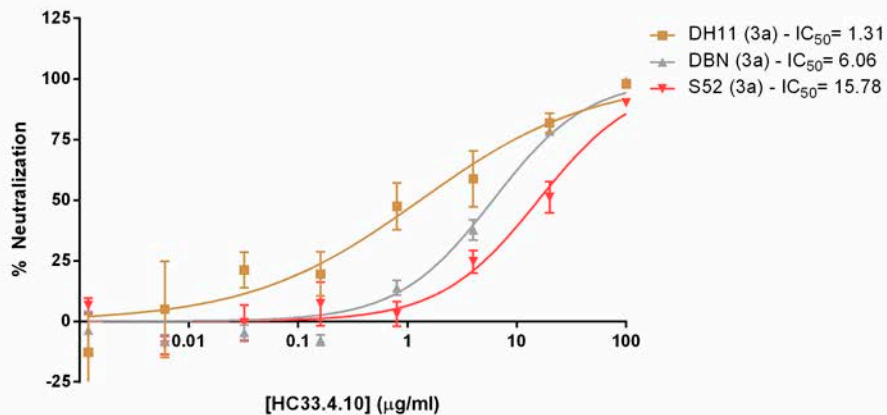

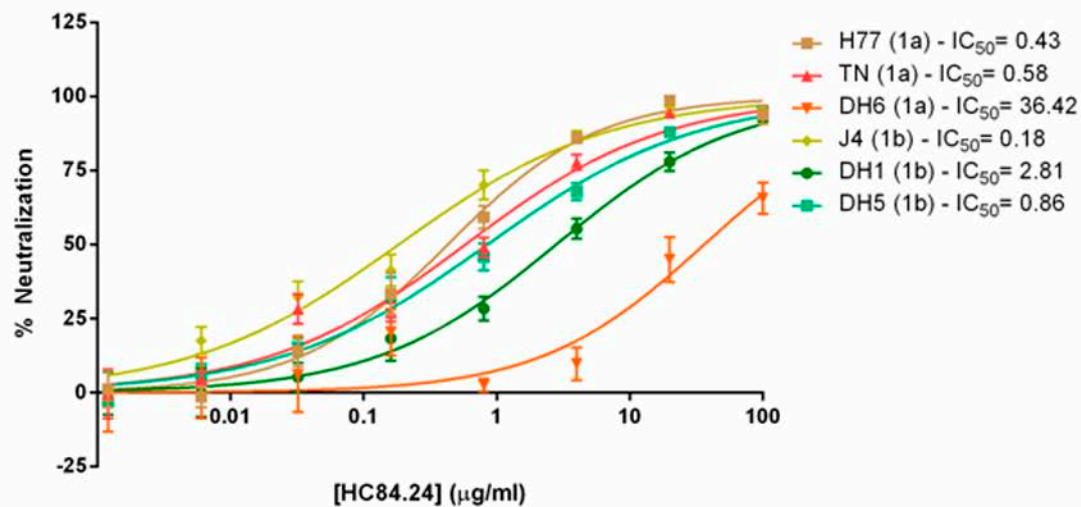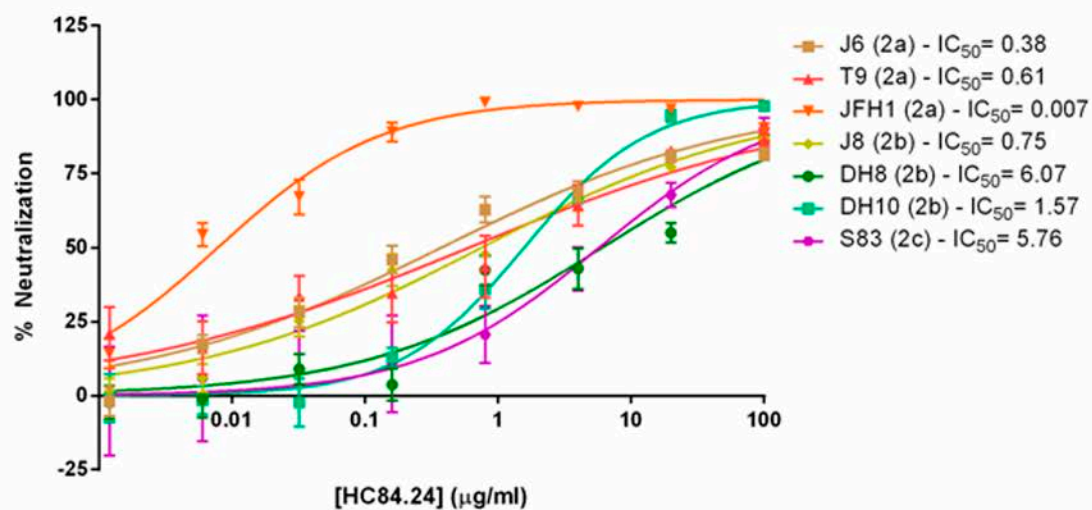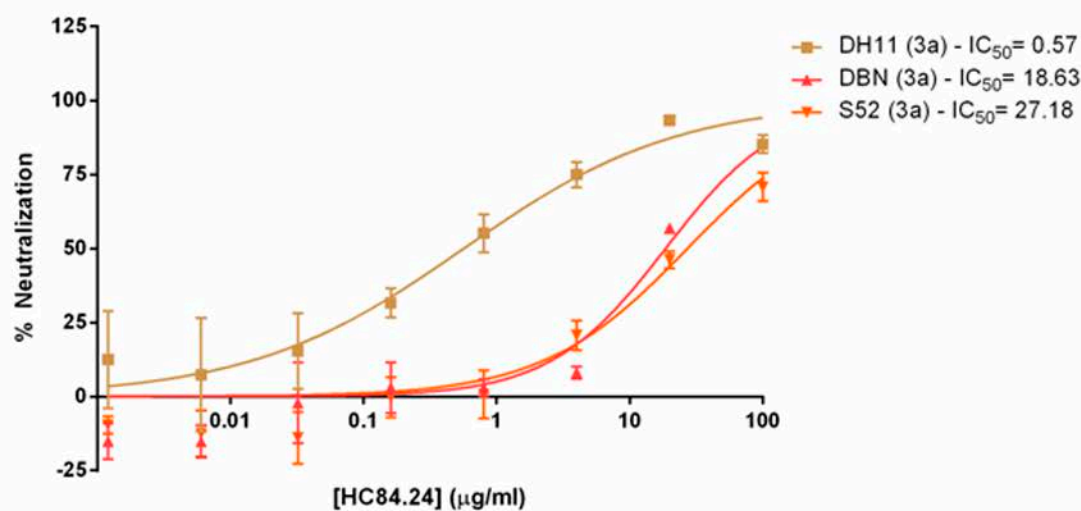

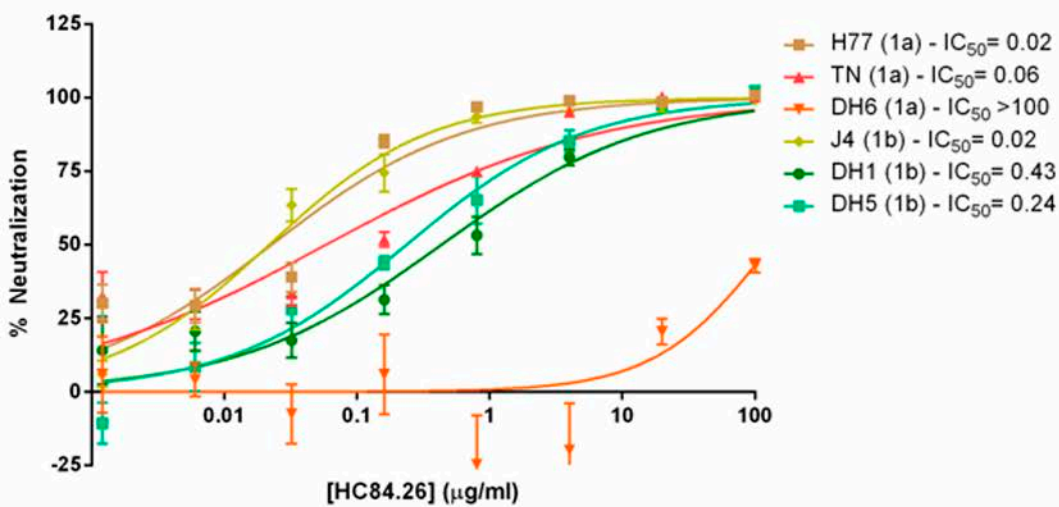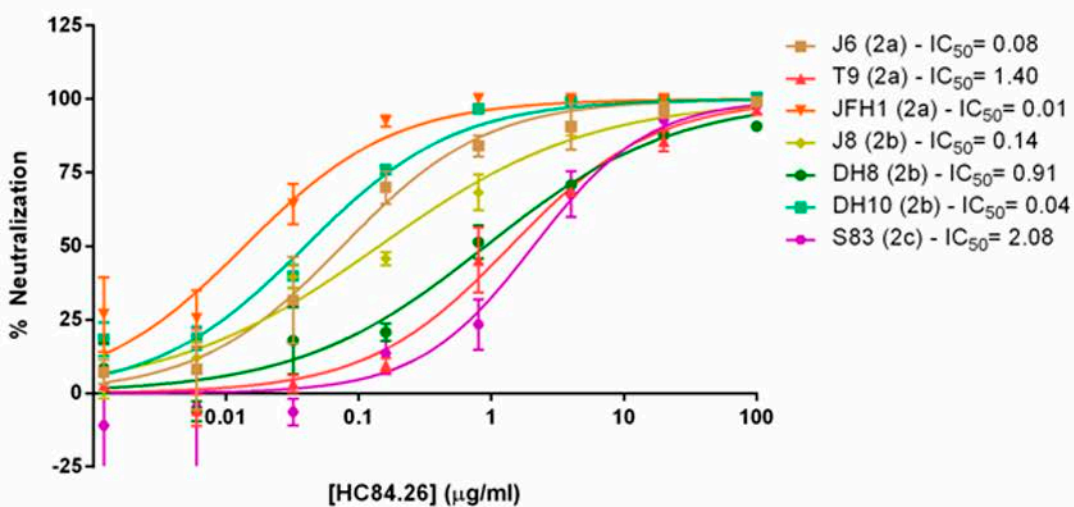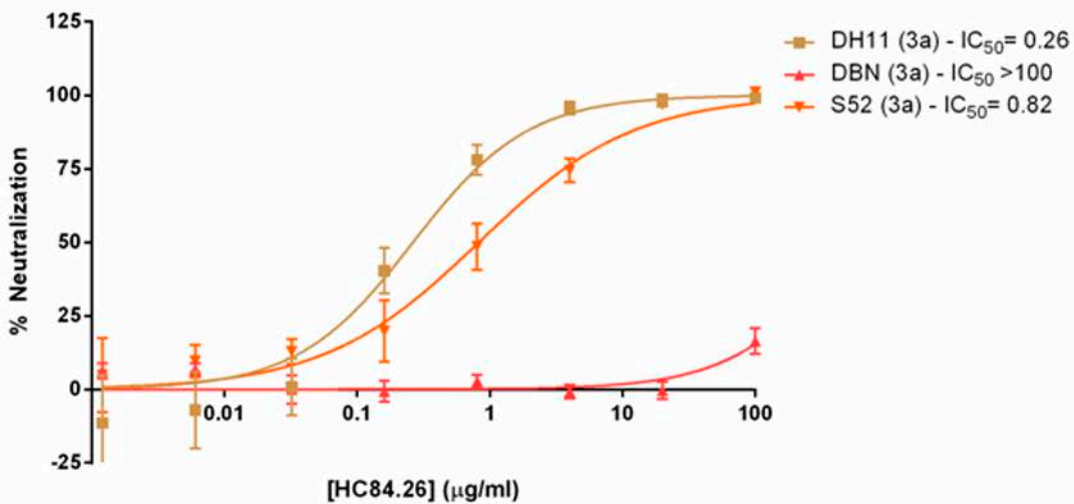

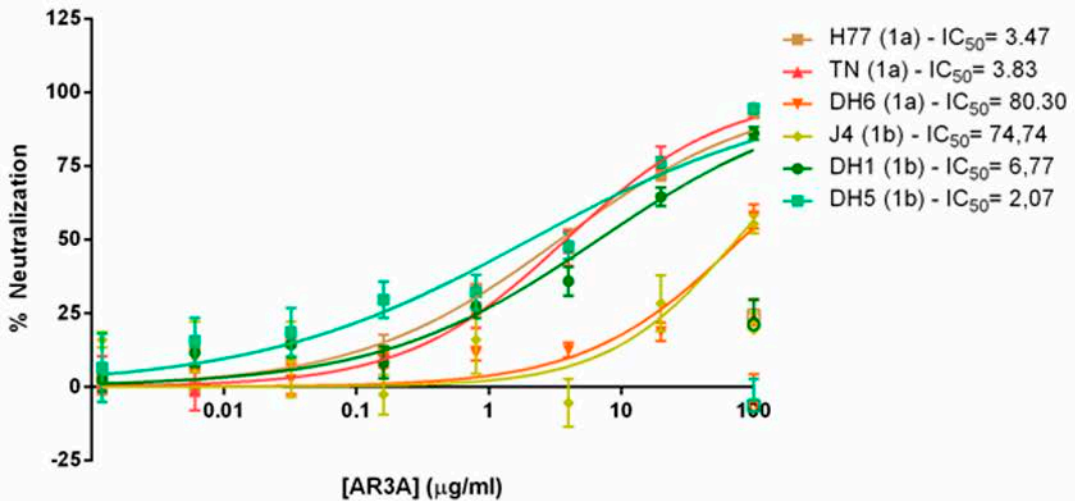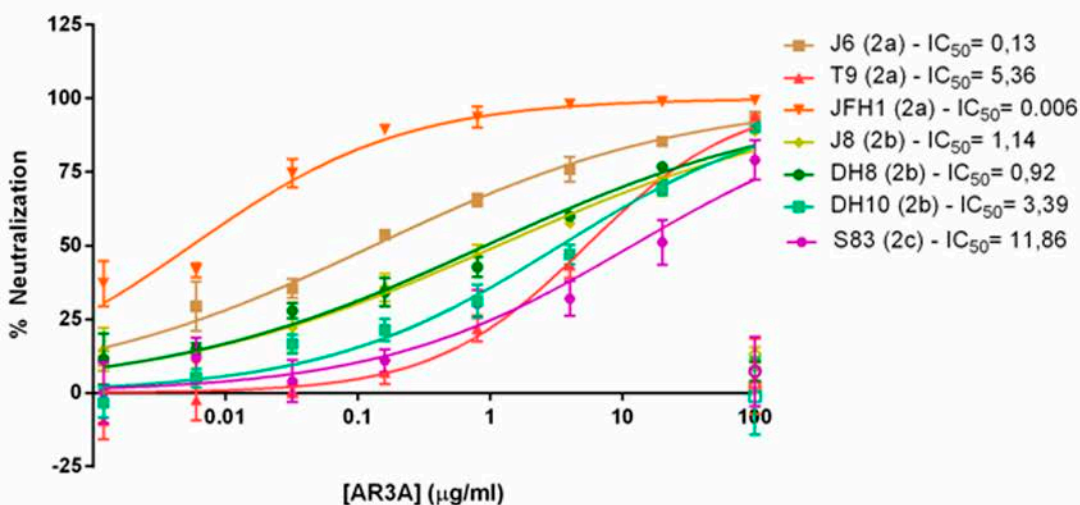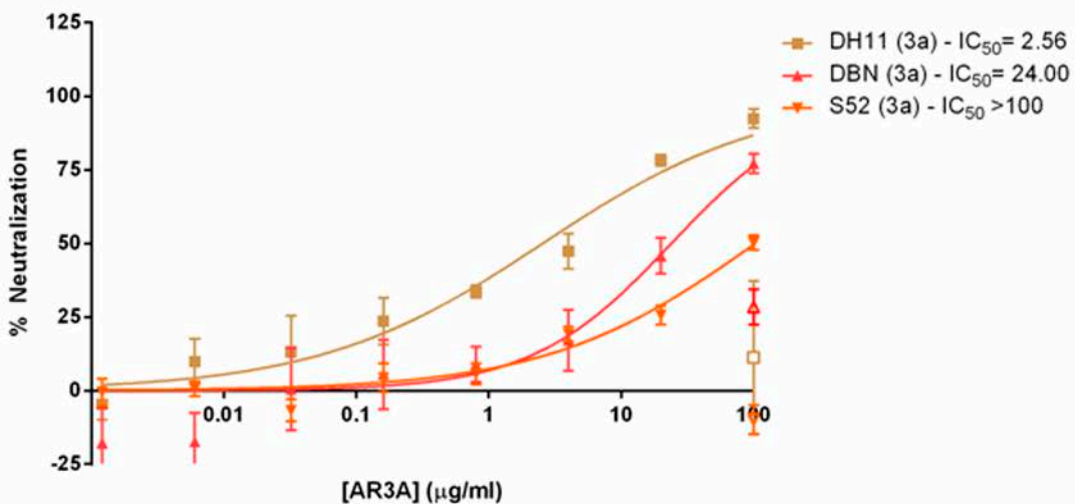



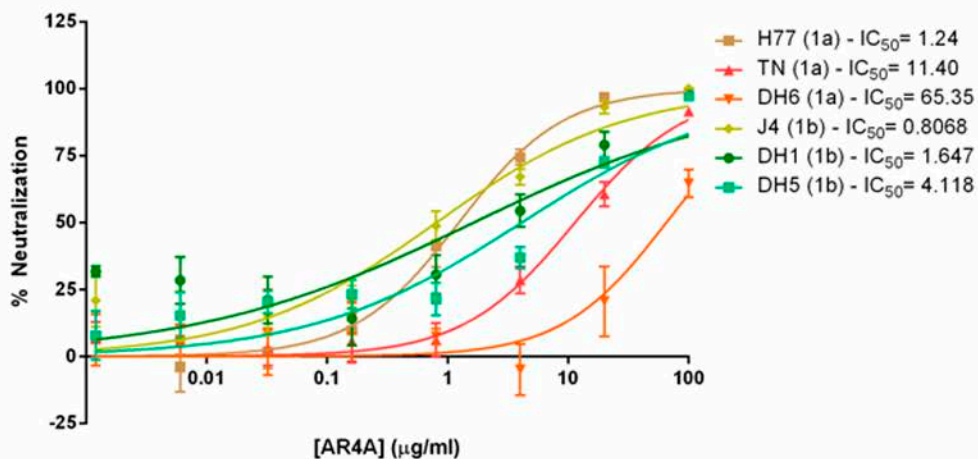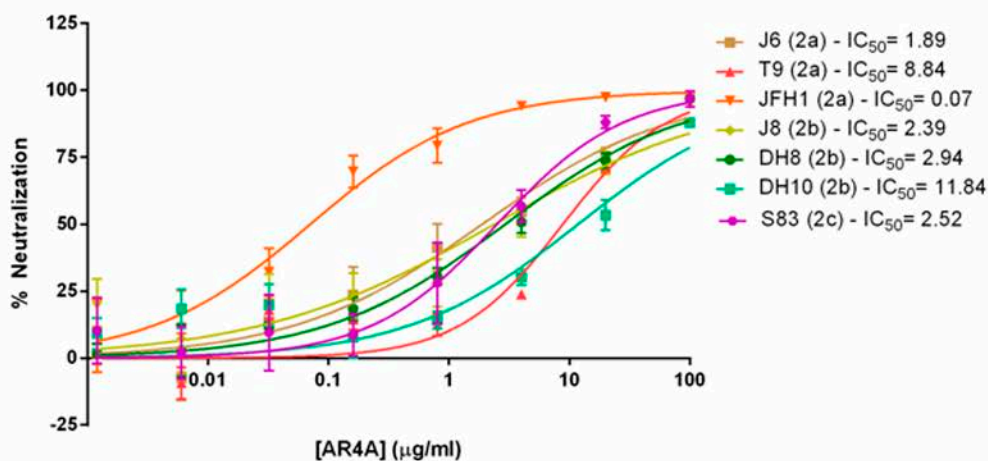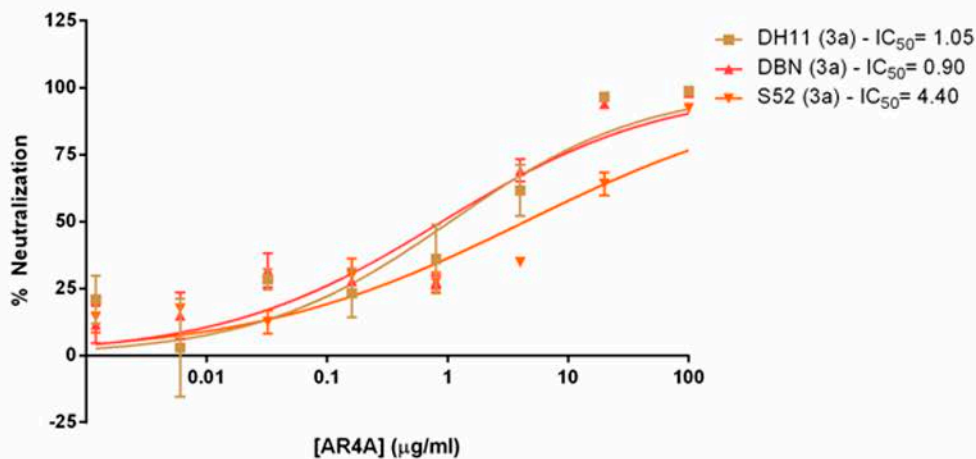

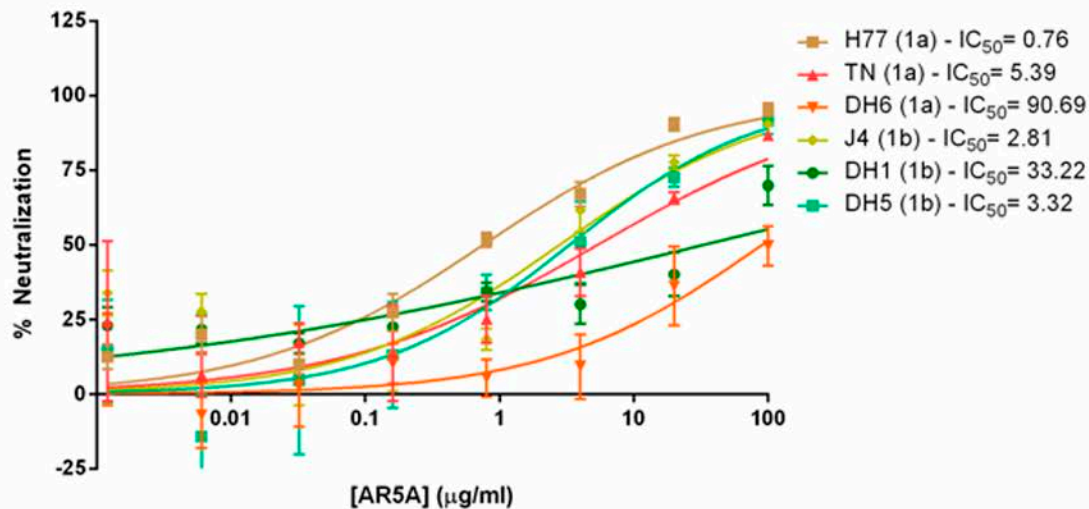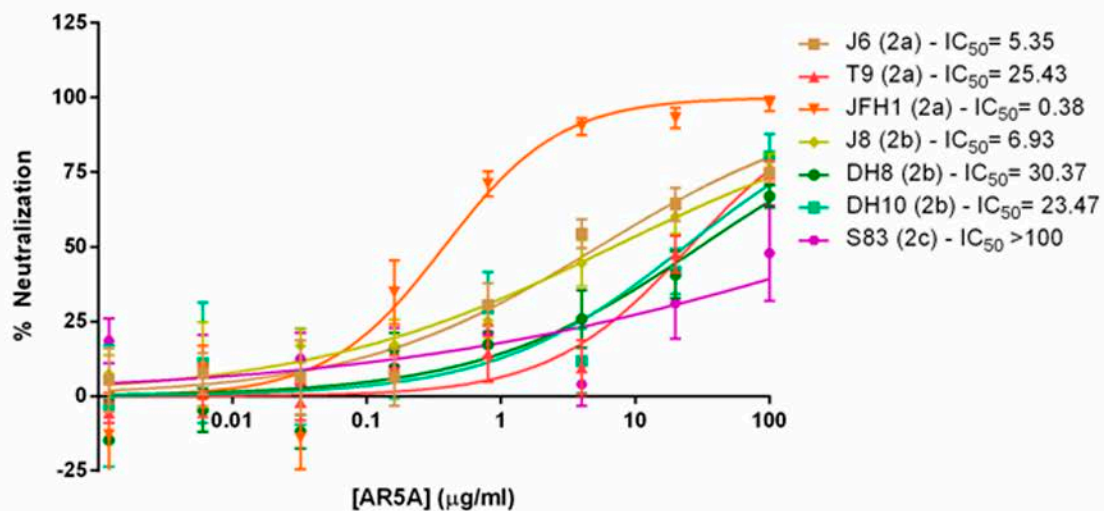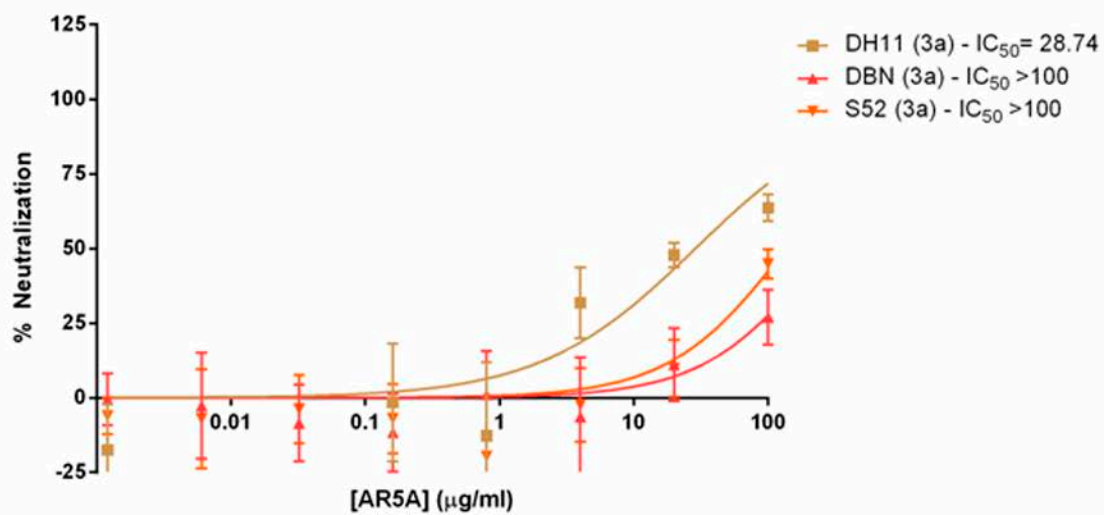

Supplement: NIHMS615103-supplement-Supp_Figures.pdf [file NIHMS615103-supplement-Supp_Figures.pdf]
